# Supplementary material
Source: publisher site journal article supplement (http://kjim.org/upload/media/kjim-2023-222-Supplementary-Table-1.pdf)
Supplement: Supplementary file 1 [file kjim-2023-222-Supplementary-Table-1.pdf]

**Supplementary Table 1. Mortality counts and rates by cause of death**

| Cause of death (level 1)                                       | Cause of death (level 2)                | Total        | Normal     | Asymptomatic ROA | Knee pain | Symptomatic ROA | p value  |
|----------------------------------------------------------------|-----------------------------------------|--------------|------------|------------------|-----------|-----------------|----------|
| All-cause                                                      |                                         | 1,128 (1.07) | 496 (0.87) | 321 (1.32)       | 97 (1.08) | 214 (1.48)      | < 0.0001 |
| Cardiovascular diseases                                        | All cardiovascular diseases (I00-I99)   | 253 (0.24)   | 96 (0.17)  | 82 (0.34)        | 15 (0.17) | 60 (0.41)       |          |
|                                                                | Hypertensive diseases (I10-I13)         | 29 (0.03)    | - (0.01)   | 15 (0.06)        | - (0.00)  | - (0.06)        |          |
|                                                                | Ischemic heart diseases (I20-I25)       | 76 (0.07)    | 32 (0.06)  | 25 (0.10)        | - (0.04)  | 15 (0.10)       |          |
|                                                                | Other heart diseases (I26-I51)          | 56 (0.05)    | 20 (0.03)  | 19 (0.08)        | - (0.04)  | 13 (0.09)       |          |
|                                                                | Cerebrovascular diseases (I60-I69)      | 84 (0.08)    | 34 (0.06)  | 22 (0.09)        | - (0.08)  | 21 (0.15)       |          |
|                                                                | Other cardiovascular diseases (I71-I99) | - (0.01)     | - (0.01)   | - (0.00)         | - (0.00)  | - (0.01)        |          |
| Malignant neoplasm (C00-C97)                                   |                                         | 399 (0.38)   | 198 (0.35) | 109 (0.45)       | 32 (0.36) | 60 (0.41)       | 0.1643   |
| Causes other than cardiovascular disease or malignant neoplasm |                                         | 470 (0.45)   | 200 (0.35) | 128 (0.53)       | 49 (0.55) | 93 (0.64)       |          |

Values in parentheses show mortality rate per 1,000 person-years.

ROA, radiographic knee osteoarthritis.

The counts of cause-specific death do not add up to the counts of death from all-cause because data in categories with less than ten observations were not released to researchers and thus are unknown.
